# Supplementary material for: Design of a MOF based on octa-nuclear zinc clusters realizing both thermal stability and structural flexibility
Source: Royal Society of Chemistry journal article supplement (doi:10.1039/d1cc05893b), 2021-12-17
Supplement: d1cc05893b1.pdf [file d1cc05893b1.pdf]

# **Design of a MOF based on octa-nuclear zinc clusters realizing both thermal stability and structural flexibility**

Yunsheng Ma,<sup>\*,a,b,‡</sup> Xiaoyan Tang,<sup>a,b,‡</sup> Ming Chen,<sup>a</sup> Akio Mishima,<sup>b</sup> Liangchun Li,<sup>c</sup> Akihiro Hori,<sup>b</sup> Xiaoyu Wu,<sup>d</sup> Lifeng Ding,<sup>d</sup> Shinpei Kusaka<sup>b</sup> and Ryotaro Matsuda<sup>\*,b</sup>

<sup>a</sup> *School of Materials Engineering, Jiangsu Key Laboratory of Advanced Functional Materials, Changshu Institute of Technology, Changshu, Jiangsu 215500, PR China*

<sup>b</sup> *Department of Materials Chemistry, Graduate School of Engineering, Nagoya University, Chikusa-ku, Nagoya 464-8603, Japan*

<sup>c</sup> *Shanghai Key Lab of Chemical Assessment and Sustainability, School of Chemical Science and Engineering, Tongji University, Shanghai 200092, PR China*

<sup>d</sup> *Department of Chemistry, Xi'an JiaoTong-Liverpool University, 111 Ren'ai Road, Suzhou Dushu Lake Higher Education Town, Jiangsu Province, 215123, China*

## Experimental

### Materials and general procedures

All the starting materials were of reagent grade and used as purchased. The ligand 9H-fluorene-2,7-dicarboxylic acid (H<sub>2</sub>FDC) was prepared according to the literature methods.<sup>S1,S2</sup> The powder X-ray diffraction (PXRD) data were collected on a Rigaku Ultima IV diffractometer with Cu-K $\alpha$  radiation. The thermal gravimetric analyses (TGA) data were recorded on a Rigaku Thermo plus TGA 8120 apparatus in the temperature range 25–500 °C under nitrogen atmosphere at a heating rate of 5 °C min<sup>-1</sup>. The <sup>1</sup>H nuclear magnetic resonance (NMR) spectra were measured on a Bruker Fourier™ 300 NMR spectrometer.

### Synthesis of 2,7-diacetylfluorene

To an ice-cooled mixture of AlCl<sub>3</sub> (40 g, 0.3 mol) and 50 mL anhydrous 1,2-dichloroethane, acetic anhydride (15.3 g, 0.15 mol) was added dropwise with stirring. Thirty minutes later, fluorene (7.3 g, 0.044 mol) in 50 mL 1,2-dichloroethane was added dropwise to the above gray-green solution. The reaction was kept at 0 °C for 5 h. Then solvent 1,2-dichloroethane was distilled off. After pouring onto ice-HCl, the aqueous phase was decanted. The remainder was recrystallized with acetone to give 2,7-diacetylfluorene in 60% yield. <sup>1</sup>H NMR [400 MHz, CDCl<sub>3</sub>]:  $\delta_{\text{H}}$  8.17 (2H, s), 8.04-8.02 (2H, d), 7.90-7.88 (2H, d), 4.00 (2H, s), 2.67 (6H, s); <sup>13</sup>C NMR:  $\delta_{\text{C}}$  197.90, 144.94, 144.51, 136.46, 127.81, 125.09, 120.71, 36.90, 26.88.

### Synthesis of bis(dibromoacetyl)fluorene

2,7-diacetylfluorene (1.05 g, 4.22 mmol) was dissolved in acetic acid (40 mL) at 50 °C, and to this solution 0.95 mL of Br<sub>2</sub> (18.6 mmol) was added on vigorous stirring in one portion. The mixture was stirred at 100 °C for 10 min, cooled to 50 °C and diluted with water. The crude product was collected by filtration and dried under vacuum. Block crystals of bis(dibromoacetyl)fluorene can be obtained by recrystallized method with dichloromethane. Yield: 92%. <sup>1</sup>H NMR [400 MHz, CDCl<sub>3</sub>]:  $\delta_{\text{H}}$  8.34 (2H, s), 8.21-8.19 (2H, d), 7.99-7.97 (2H, d), 6.77 (2H, s), 4.12 (2H, s); <sup>13</sup>C NMR:  $\delta_{\text{C}}$  185.72, 145.81, 144.89, 130.42, 129.27, 126.64, 121.33, 39.76, 37.04.

### Synthesis of fluorene-2,7-dicarboxylic acid

In a 3-neck flask, equipped with mechanical stirrer, bis(dibromoacetyl)fluorene (1.15 g, 2.1 mmol) was dissolved in 30 mL of 1,4-dioxane at 70 °C and to this solution on vigorous stirring was added warm (80 °C) solution of sodium carbonate (2 g, 18.9 mmol) in 10 mL of water immediately followed by Br<sub>2</sub> (0.31 mL, 6.1 mmol). In 30 sec, 15 mL of water (80 °C) was added, followed in 1 min intervals by portions of 15, 15 and 30 mL of hot water. The mixture was boiled for 5 h to remove bromoform. After cooled down, most of 1,4-dioxane was evaporated under reduced pressure. White solid of fluorene-2,7-dicarboxylic acid could precipitate after acidify the above pale-yellow solution with condensed HCl. The white product was centrifuged and washed with distilled water to remove excess HCl. Fluorene-2,7-dicarboxylic acid was dried under vacuum at 80 °C. Yield: 85%. <sup>1</sup>H NMR [400 MHz, (CD<sub>3</sub>)<sub>2</sub>SO]: δ<sub>H</sub> 13.04 (2H, s), 8.21 (2H, s), 8.12-8.10 (2H, d), 8.05-8.03 (2H, d), 4.07 (2H, s); <sup>13</sup>C NMR: δ<sub>C</sub> 167.89, 144.82, 144.68, 130.34, 128.90, 126.69, 121.33, 36.88.

#### **Synthesis and structure of [(CH<sub>3</sub>)<sub>2</sub>NH<sub>2</sub>]<sub>2</sub>[Zn<sub>8</sub>O<sub>3</sub>(FDC)<sub>6</sub>]·7DMF**

Zn(NO<sub>3</sub>)<sub>2</sub>·6H<sub>2</sub>O (60 mg, 2 mmol), H<sub>2</sub>FDC (50 mg, 2 mmol), DMF (10 mL), and H<sub>2</sub>O (0.2 mL) were mixed in a 20 mL glass vial, which was capped, heated to 80 °C for 72 h, and cooled to room temperature. The pale-yellow cubic crystals were collected and washed with DMF. The crystals of [(CH<sub>3</sub>)<sub>2</sub>NH<sub>2</sub>]<sub>2</sub>[Zn<sub>8</sub>O<sub>3</sub>(FDC)<sub>6</sub>]·7DMF (**Zn<sub>8</sub>-as**) were heated at 120°C under vacuum for 24 h to obtain **Zn<sub>8</sub>-de**.

For **Zn<sub>8</sub>-as**:

IR (cm<sup>-1</sup>, KBr): 1668.98 (s), 1611.63 (s), 1559.28 (m), 1536.84 (m), 1481.99 (m), 1442.11 (m), 1397.23 (vs), 778.95 (s), 492.24 (s), 457.34 (s).

<sup>1</sup>H NMR [400 MHz, (CD<sub>3</sub>)<sub>2</sub>SO]: δ<sub>H</sub> 8.14 (12H, s, FDC<sup>-</sup>), 8.07-8.05 (12H, m, FDC<sup>-</sup>), 7.99-7.97 (12H, m, FDC<sup>-</sup>), 7.91 (7H, s, DMF), 5.90 (DCI), 4.04 (12H, s, FDC<sup>-</sup>), 2.85 (21H, s, DMF), 2.69 (21H, s, DMF) and 2.46 (12H, m, (CH<sub>3</sub>)<sub>2</sub>NH<sub>2</sub><sup>+</sup>); <sup>13</sup>C NMR: δ<sub>C</sub> 167.92, 162.95, 144.84, 144.67, 130.32, 128.93, 126.68, 121.36, 36.86, 36.35, 34.63 and 31.30.

For **Zn<sub>8</sub>-de**:

IR (cm<sup>-1</sup>, KBr): 1617.15 (s), 1552.4 (m), 1478.3 (m), 775.1 (s), 472.2 (s).

<sup>1</sup>H NMR [400 MHz, (CD<sub>3</sub>)<sub>2</sub>SO]: δ = 8.14 (12H, s, FDC<sup>-</sup>), 8.06-8.04 (12H, d, FDC<sup>-</sup>),

7.98-7.96 (12H, d, FDC<sup>-</sup>), 5.84 (DCI), 4.03 (12H, s, FDC<sup>-</sup>), 2.47 (12H, m, (CH<sub>3</sub>)<sub>2</sub>NH<sub>2</sub><sup>+</sup>);  
<sup>13</sup>C NMR: δ<sub>C</sub> 167.89, 144.80, 144.64, 130.28, 128.91, 126.66, 121.35, 36.85 and 34.57.

### Gas adsorption measurement

Before measurement, the solvent-exchanged sample (about 100 mg) was prepared by immersing the as-synthesized sample in methanol to remove non-volatile solvents. The completely activated sample was obtained by heating the solvent-exchanged sample at 120 °C under reduced pressure (<10<sup>-2</sup> Pa) for more than 20 h.

Gas adsorption isotherms were obtained using a Belsorp-max adsorption instrument from BEL Japan Inc. using the volumetric technique. The coincident PXRD/adsorption measurements were carried out using a Rigaku Ultima IV with CuKα radiation (λ = 1.5406 Å) connected with BELSORP-18 volumetric adsorption equipment (Bel Japan Inc.). Those apparatuses were synchronized with each other and each PXRD pattern was obtained at each equilibrium point of the sorption isotherms.

### Single-crystal X-ray diffraction analyses

Single-crystal X-ray diffraction measurement was performed at 103 K with Rigaku Saturn 70 CCD system and 'XtaLAB Pro: Kappa single' with MoKα optic (λ = 0.71075 Å) and a confocal monochromator. Data were processed using CrystalClear TM-SM (version 1.4.0). The structures were solved by directed methods and refined using the full-matrix least-squares technique using the SHELXL-2018/3 package.<sup>S3</sup> All non-hydrogen atoms were refined with anisotropic displacement parameters and all hydrogen atoms were refined isotropically, with the isotropic vibration parameters related to the non-hydrogen atoms to which they are bonded. While we are fully aware that the charged entities, such as [(CH<sub>3</sub>)<sub>2</sub>NH<sub>2</sub>]<sup>+</sup> reported herein, are not recommended to be 'SQUEEZED', we are however not able to locate the [(CH<sub>3</sub>)<sub>2</sub>NH<sub>2</sub>]<sup>+</sup> cation due to the high symmetry of the framework that induces severe disorder. The electron densities ascribed to [(CH<sub>3</sub>)<sub>2</sub>NH<sub>2</sub>]<sup>+</sup> cation and other unidentified solvates are removed by SQUEEZE function of the PLATON program.<sup>S4,S5</sup> Crystallographic and refinement details of **Zn<sub>8-as</sub>** and **Zn<sub>8-de</sub>** are listed in Table S1.

**Table S1** Crystal data and structure refinements for **Zn<sub>8</sub>-as** and **Zn<sub>8</sub>-de**

|                                                                   | <b>Zn<sub>8</sub>-as</b>                                        | <b>Zn<sub>8</sub>-de</b>                                        |
|-------------------------------------------------------------------|-----------------------------------------------------------------|-----------------------------------------------------------------|
| Empirical formula                                                 | C <sub>90</sub> H <sub>48</sub> O <sub>27</sub> Zn <sub>8</sub> | C <sub>90</sub> H <sub>48</sub> O <sub>27</sub> Zn <sub>8</sub> |
| Formula weight                                                    | 2084.24                                                         | 2084.24                                                         |
| Crystal system                                                    | trigonal                                                        | trigonal                                                        |
| Space group                                                       | <i>R</i> -3/ <i>c</i>                                           | <i>R</i> -3/ <i>c</i>                                           |
| <i>a</i>                                                          | 23.159(3)                                                       | 19.3732(9)                                                      |
| <i>b</i>                                                          | 23.159(3)                                                       | 19.3732(9)                                                      |
| <i>c</i>                                                          | 70.110(14)                                                      | 78.804(3)                                                       |
| <i>V</i>                                                          | 32565(12)                                                       | 25614(3)                                                        |
| <i>Z</i>                                                          | 12                                                              | 12                                                              |
| $\rho_{\text{calcd}}$ (g cm <sup>-3</sup> )                       | 1.275                                                           | 1.621                                                           |
| $\mu$ (mm <sup>-1</sup> )                                         | 1.799                                                           | 2.287                                                           |
| <i>F</i> (000)                                                    | 12528                                                           | 12528                                                           |
| Data collected                                                    | 69953                                                           | 55272                                                           |
| Independent data                                                  | 6382                                                            | 5212                                                            |
| Goodness-of-fit                                                   | 1.10                                                            | 1.21                                                            |
| $R_1$ , <sup>[a]</sup> $wR_2$ ( $I > 2\sigma(I)$ ) <sup>[b]</sup> | 0.1464, 0.3804                                                  | 0.1275, 0.3326                                                  |
| $R_1$ , $wR_2$ (all data)                                         | 0.1521, 0.3839                                                  | 0.2269, 0.3693                                                  |
| GOF <sup>[c]</sup>                                                | 1.10                                                            | 1.21                                                            |

<sup>[a]</sup>  $R_1 = \Sigma||F_o| - |F_c|| / \Sigma|F_o|$ , <sup>[b]</sup>  $wR_2 = \{\Sigma[\omega(F_o^2 - F_c^2)^2] / \Sigma[\omega(F_o^2)]\}^{1/2}$ , and <sup>[c]</sup>  $GOF = \{\Sigma[\omega(F_o^2 - F_c^2)^2] / (n - p)\}^{1/2}$ , where  $n$  is the number of reflections, and  $p$  the total number of parameters refined.

## Supplementary Figures

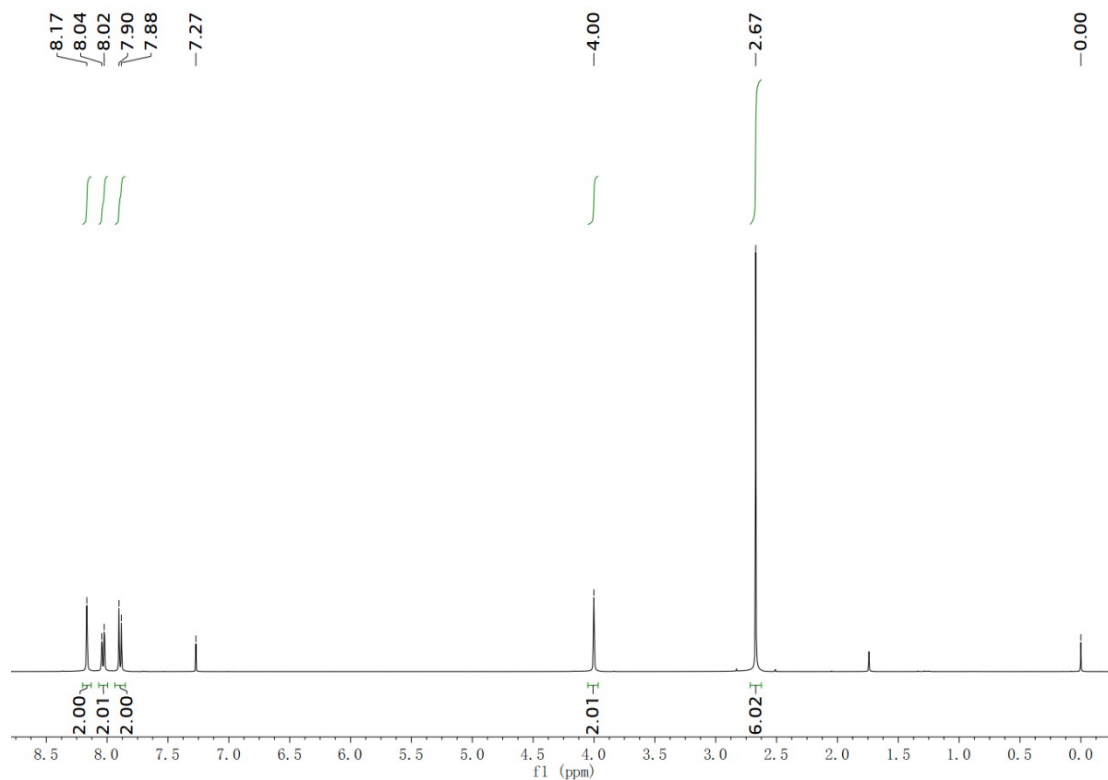

**Fig. S1** The <sup>1</sup>H NMR spectrum of 2,7-diacetylfluorene with CDCl<sub>3</sub> as solvent.

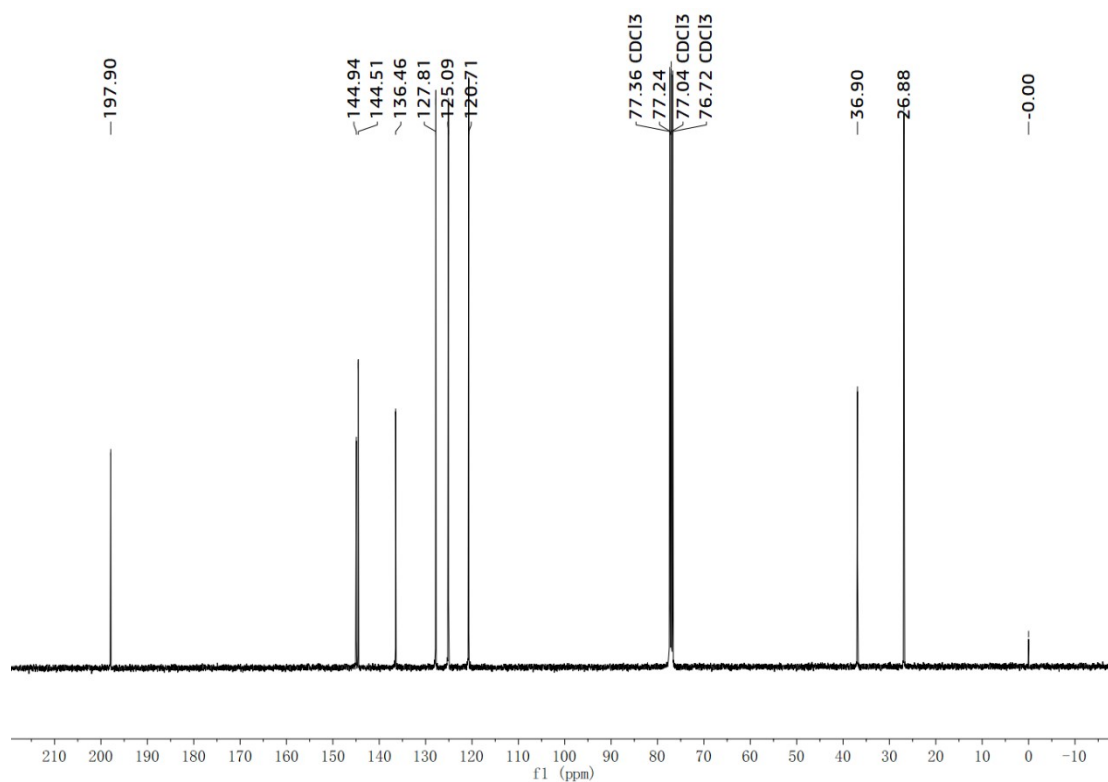

**Fig. S2** The <sup>13</sup>C NMR spectrum of 2,7-diacetylfluorene with CDCl<sub>3</sub> as solvent.

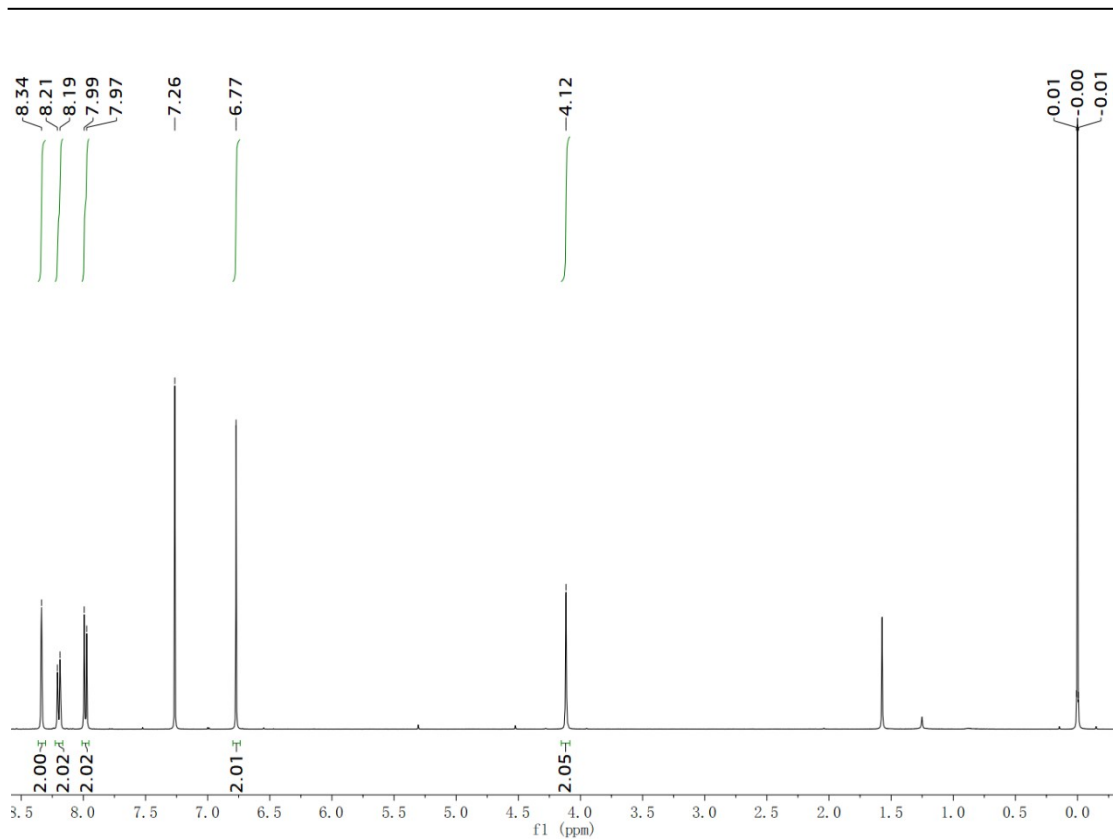

**Fig. S3** The  $^1\text{H}$  NMR spectrum of bis(dibromoacetyl)fluorene with  $\text{CDCl}_3$  as solvent.

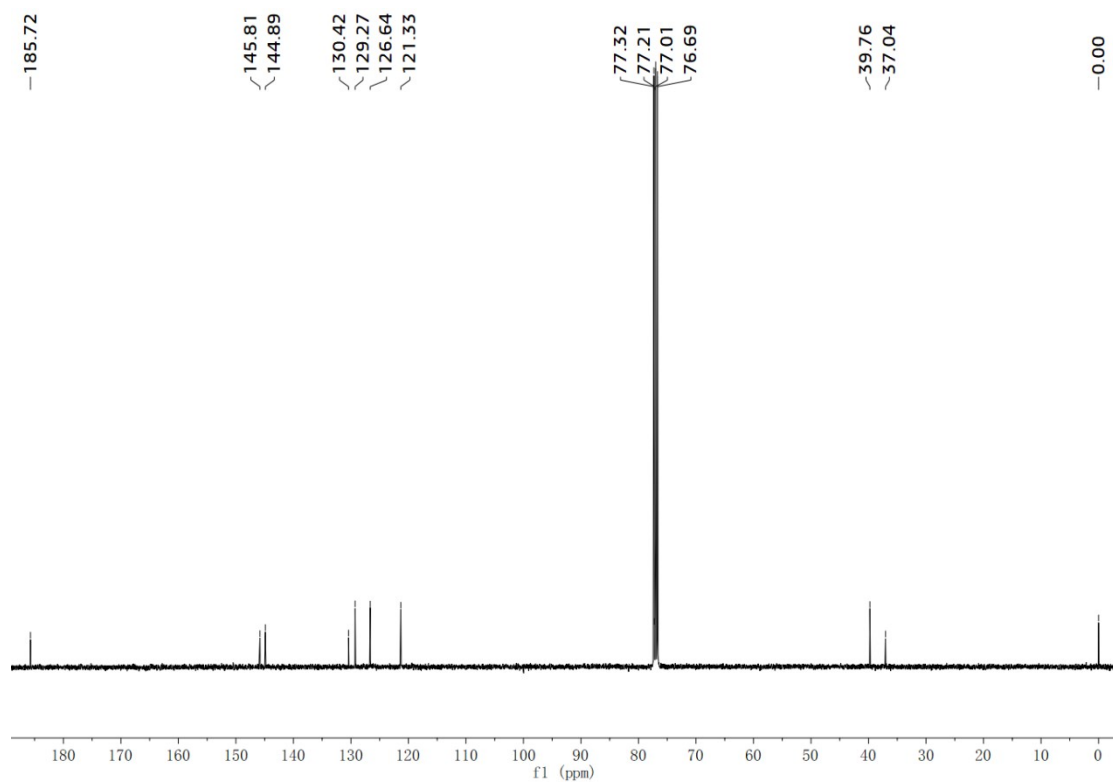

**Fig. S4** The  $^{13}\text{C}$  NMR spectrum of bis(dibromoacetyl)fluorene with  $\text{CDCl}_3$  as solvent.

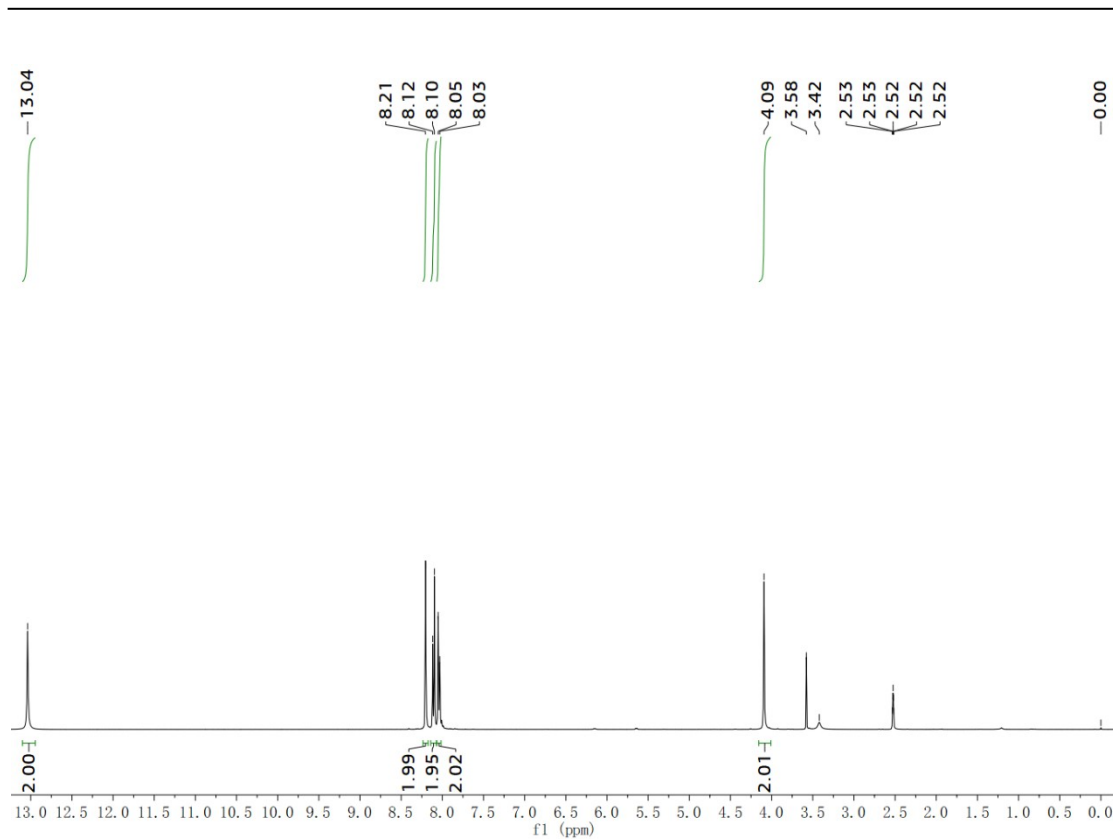

**Fig. S5** The  $^1\text{H}$  NMR spectrum of fluorene-2,7-dicarboxylic acid with  $\text{DMSO-}d_6$  as solvent.

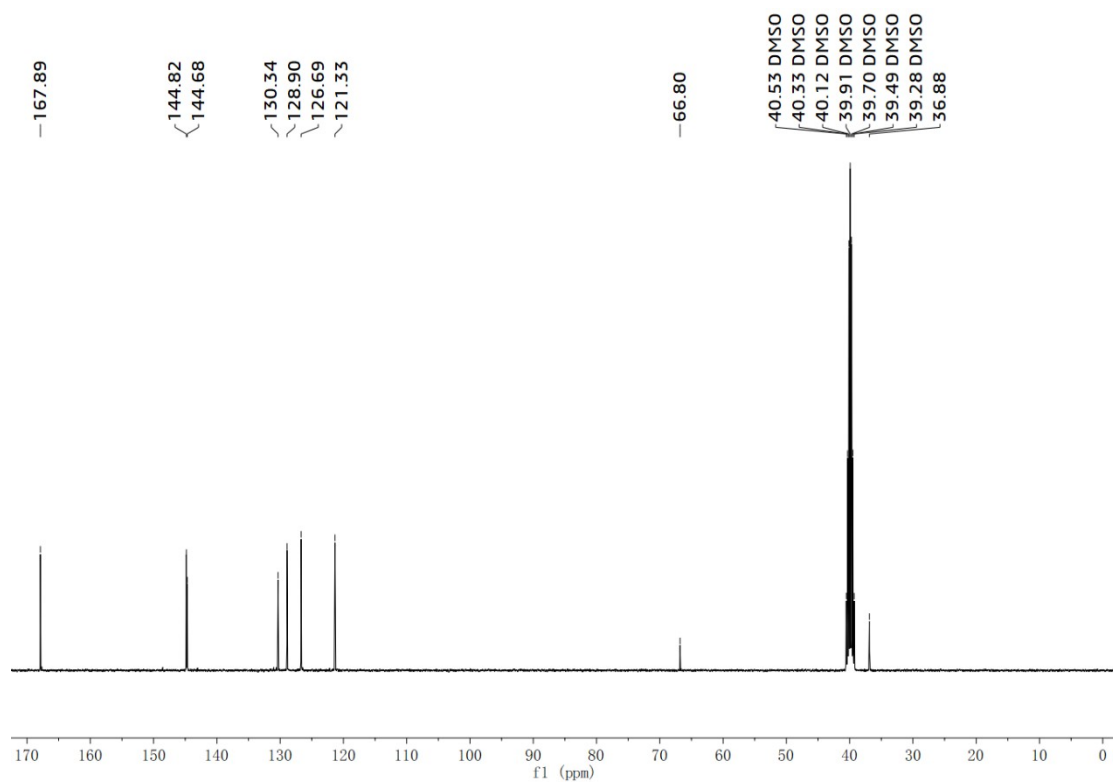

**Fig. S6** The  $^{13}\text{C}$  NMR spectrum of fluorene-2,7-dicarboxylic acid with  $\text{DMSO-}d_6$  as solvent.



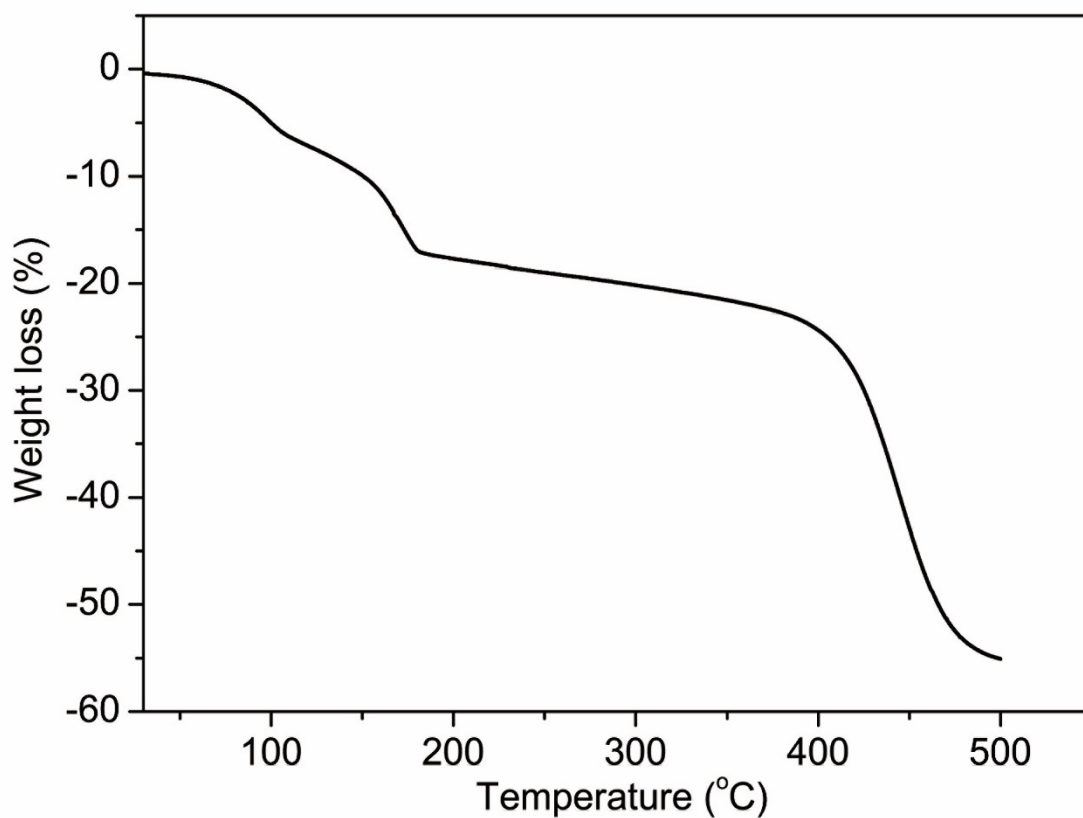

**Fig. S7** Thermogravimetric curve of **Zn<sub>8-as</sub>** under N<sub>2</sub>.

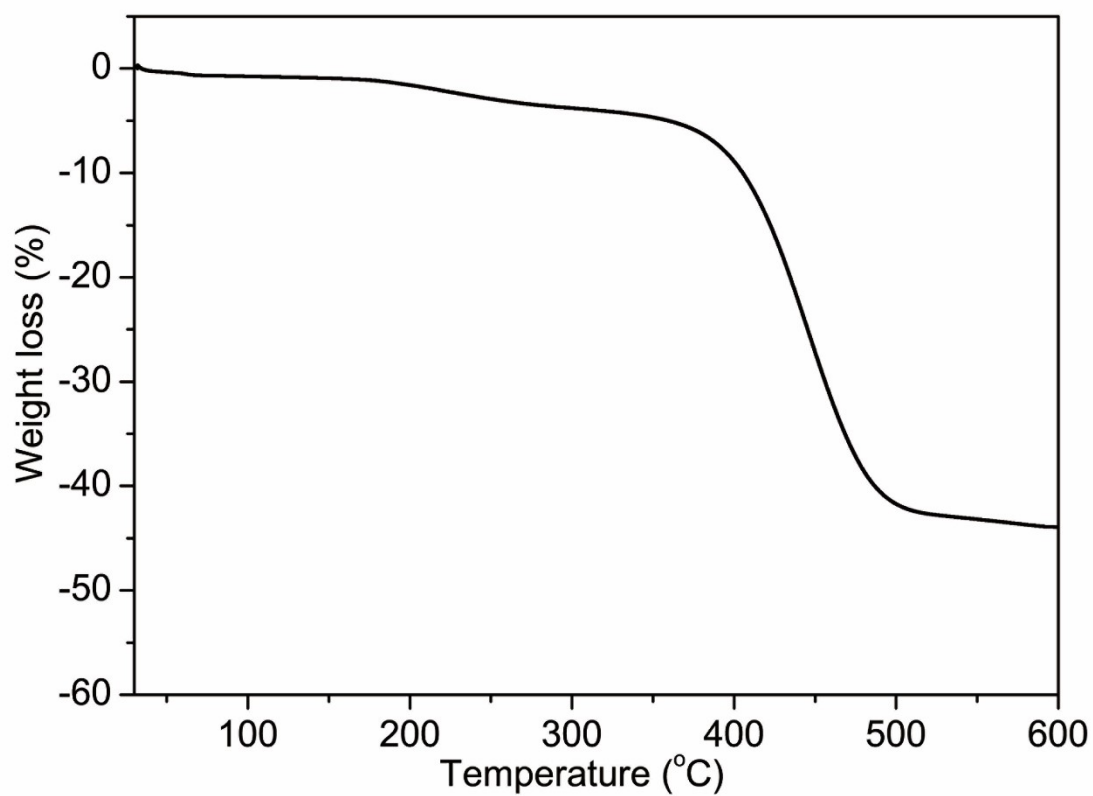

**Fig. S8** Thermogravimetric curve of **Zn<sub>8-de</sub>** under N<sub>2</sub>.

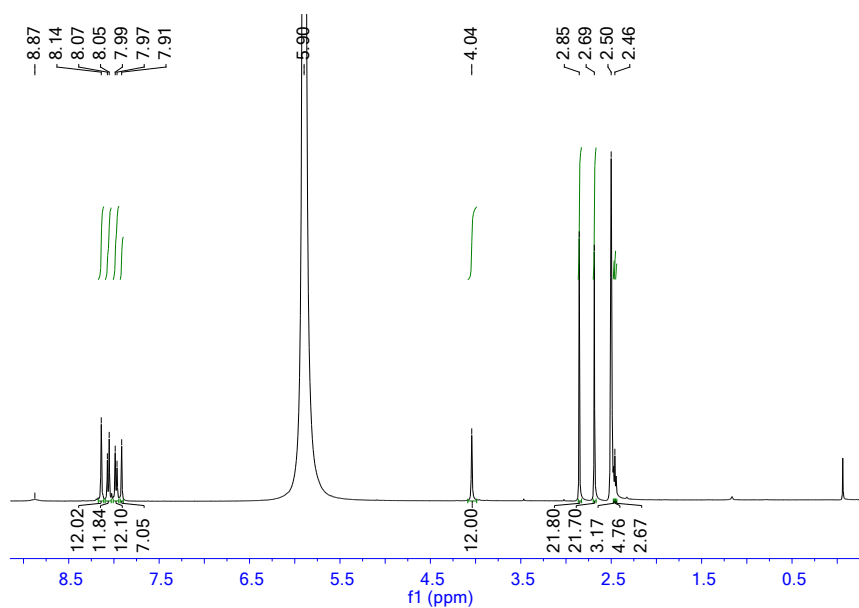

Fig. S9 The  $^1\text{H}$  NMR spectrum of  $\text{Zn}_8\text{-as}$  with  $\text{DMSO-}d_6$  as solvent.

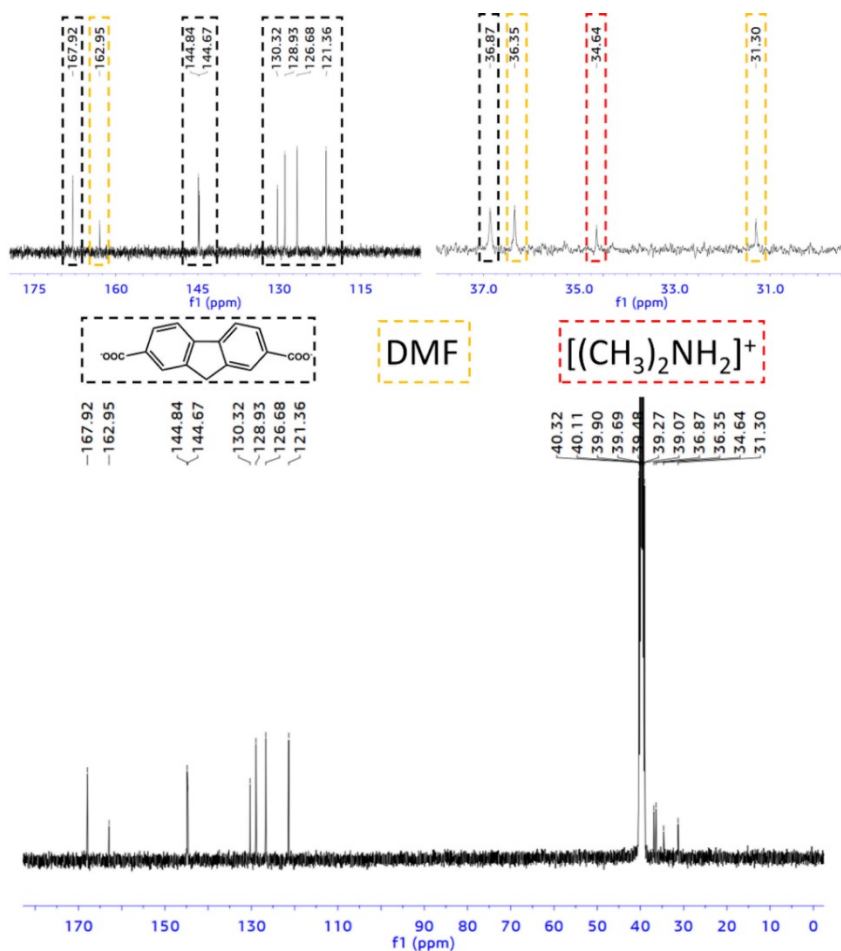

Fig. S10 The  $^{13}\text{C}$  NMR spectrum of  $\text{Zn}_8\text{-as}$  with  $\text{DMSO-}d_6$  as solvent.

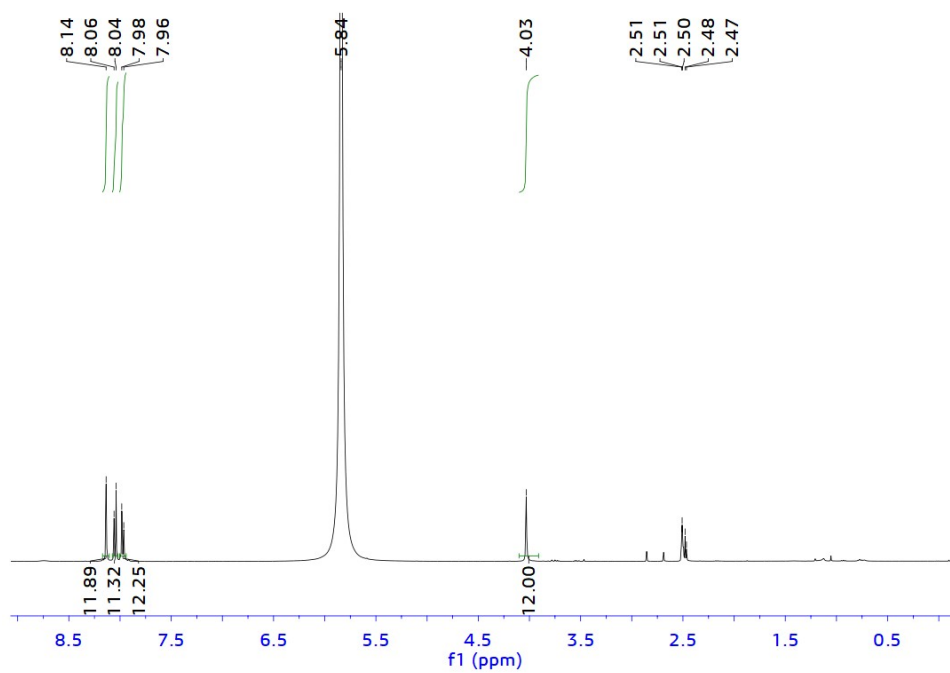

**Fig. S11** The  $^1\text{H}$  NMR spectrum of **Zn<sub>8</sub>-de** with  $\text{DMSO-}d_6$  as solvent.

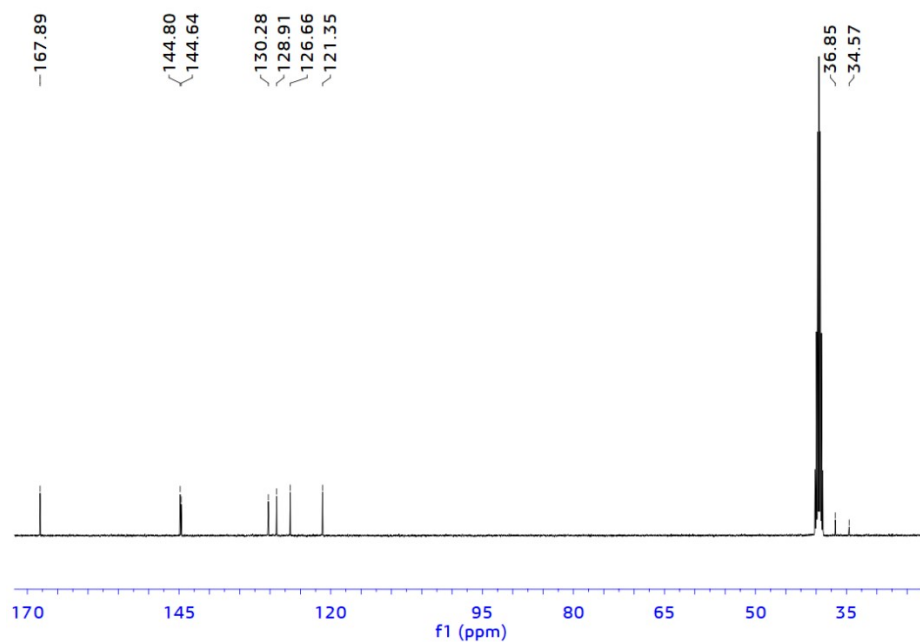

**Fig. S12** The  $^{13}\text{C}$  NMR spectrum of **Zn<sub>8</sub>-de** with  $\text{DMSO-}d_6$  as solvent.

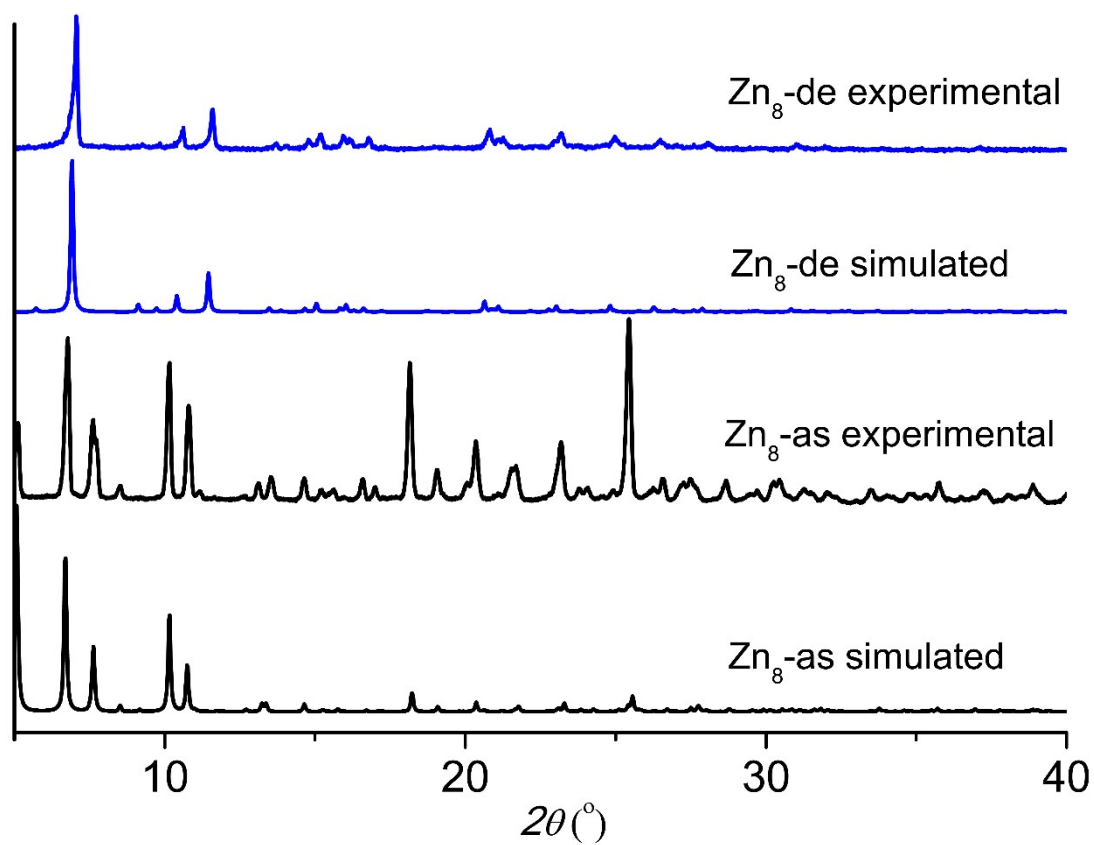

**Fig. S13** PXRd patterns for  **$\text{Zn}_8\text{-as}$**  and  **$\text{Zn}_8\text{-de}$** .

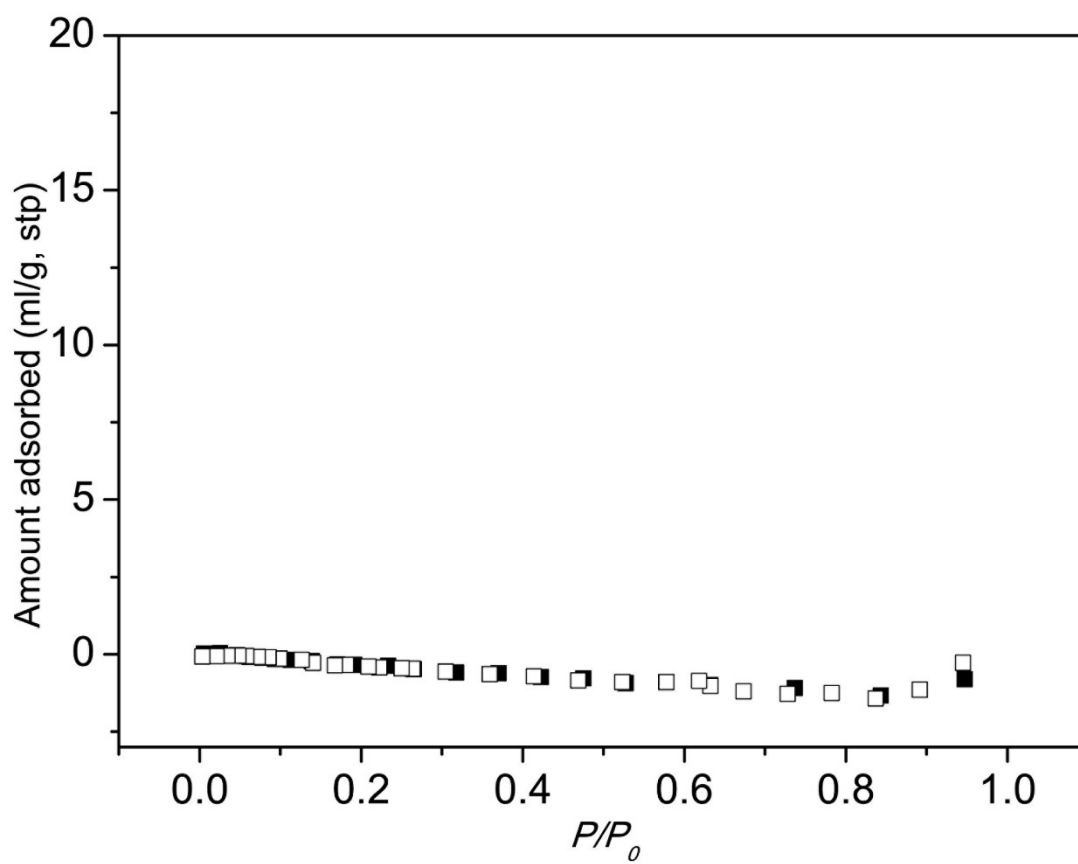

Fig. S14 N<sub>2</sub> adsorption (■) and desorption (□) profiles of **Zn<sub>8-de</sub>** at 77 K.

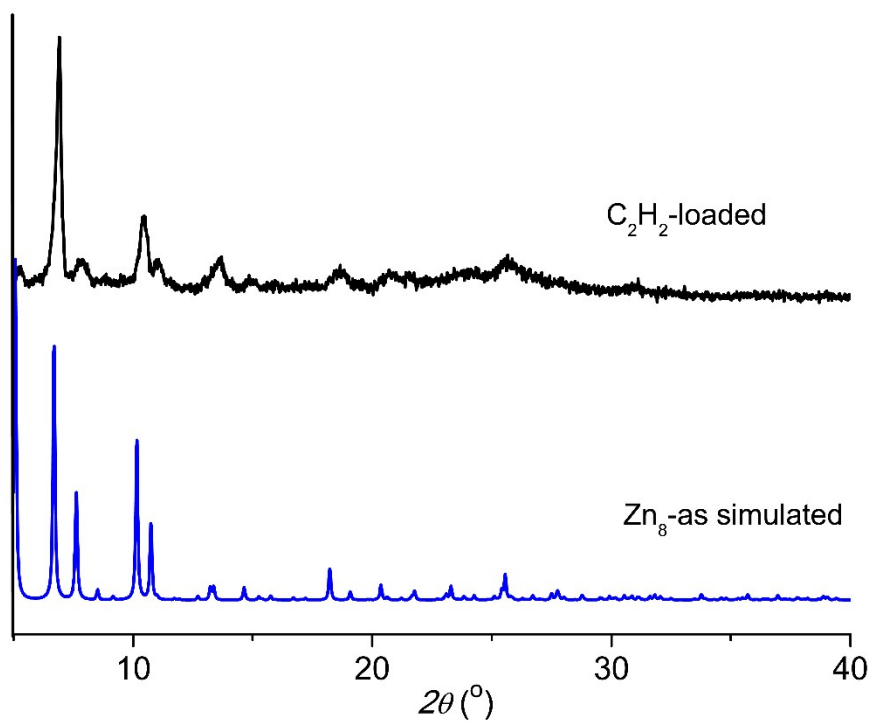

Fig. S15 PXRD patterns for **Zn<sub>8-as</sub>** and C<sub>2</sub>H<sub>2</sub> loaded form.

---

## Computational Methodology

Density functional theory (DFT) calculations with the plane-wave pseudopotential formalism and Perdew-Burke-Ernzerhof exchange-correlation functional cut-off at 500 eV were performed using Vienna ab initio simulation package (VASP).<sup>S6</sup> DFT-D3(BJ) was implanted to compensate the Van de Waals dispersion.<sup>S7</sup> During the geometric optimizations of the gas particles, positions of framework atoms and  $(\text{CH}_3)_2\text{NH}_2^+$  anions were constrained.

The binding energy of  $\text{C}_2\text{H}_2$  and  $\text{CO}_2$  was calculated by the following equation:

$$E_C = E_{A+B} - E_A - E_B$$

Where  $E_A$  is the energy of the optimized MOF structure.  $E_B$  is the energy of the gas molecules.  $E_{A+B}$  is the energy of the optimized binding complex of the MOFs with either  $\text{C}_2\text{H}_2$  or  $\text{CO}_2$ . To find the global minimum  $E_{A+B}$ , multiple initial configurations of the gas molecules were attempted.

Before the  $\text{C}_2\text{H}_2$  and  $\text{CO}_2$  DFT binding energy calculation, Monte Carlo (MC) simulation was performed using RASPA package<sup>S8</sup> to locate the  $(\text{CH}_3)_2\text{NH}_2^+$  cations that could diffuse inside the pores as counter ions. The computational model of  $(\text{CH}_3)_2\text{NH}_2^+$  was taken from the work of Nagys<sup>S9</sup> and Maria.<sup>S10</sup> Computational model of **Zn<sub>8</sub>-as** and **Zn<sub>8</sub>-de** were described using Universal Forcefield (UFF),<sup>S11</sup> where the partial charges were computed using Density-Derived Electrostatic Charges method (DDEC): DDEC3 protocols.<sup>S12</sup>

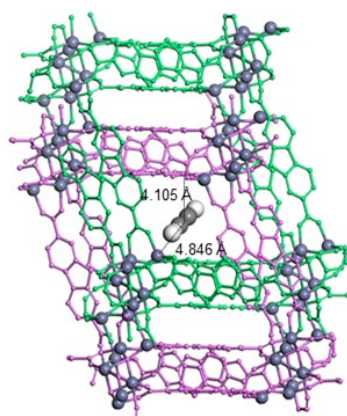

$C_2H_2$  in **Zn<sub>8</sub>-as**

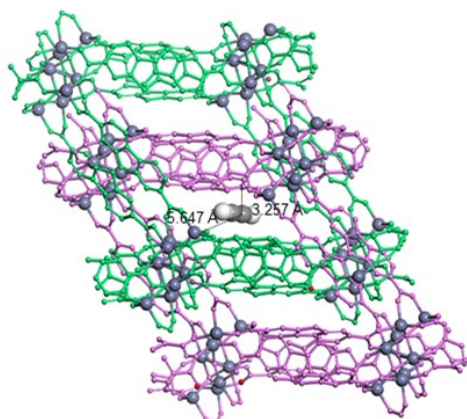

$C_2H_2$  in **Zn<sub>8</sub>-de**

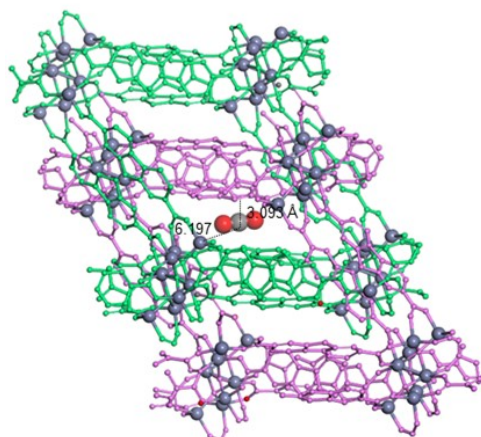

$CO_2$  in **Zn<sub>8</sub>-de**

**Fig. S16** DFT optimized binding positions (a)  $C_2H_2$  in **Zn<sub>8</sub>-as**; (b)  $C_2H_2$  in **Zn<sub>8</sub>-de**; (c)  $CO_2$  in **Zn<sub>8</sub>-de** (Color scheme: Brown, Zn; C, grey; O, red.  $[(CH_3)_2NH_2]^+$  cations and hydrogen atoms were omitted for clarity)

---

## References

- S1 Sulzberg, T.; Cotter, R. J. Electron acceptors derived from fluorene-carboxylic acids and their charge-transfer complexes. *J. Org. Chem.* 1970, **35**, 2762–2769.
- S2 P.J. Skabara, R. Berridge, I.M. Serebryakov, A.L. Kanibolotsky, L. Kanibolotskaya, S. Gordeyev, I.F. Perepichka, N.S. Sariciftci, C. Winder, *J. Mater. Chem.*, 2007, **17**, 1055-1062.
- S3 Sheldrick, G. SHELXL-2018/3, Program for the Solution and Refining of Crystal structures. **2018**.
- S4 Spek, A. L. Single-crystal structure validation with the program PLATON. *J. Appl. Cryst.* 2003, **36**, 7–13.
- S5 Spek, A. L. PLATON SQUEEZE: A tool for the calculation of the disordered solvent contribution to the calculated structure factors. *Acta Crystallogr., Sect. C*, 2015, **71**, 9–18.
- S6 (a) G. Kresse, *J. Non. Cryst. Solids*, 1995, 192–193, 222–229; (b) G. Kresse and J. Furthmüller, *Phys. Rev. B*, 1996, **54**, 11169–11186.
- S7 (a) S. Grimme, J. Antony, S. Ehrlich and H. Krieg, *J. Chem. Phys.*, 2010, **132**, 154104; (b) S. Grimme, S. Ehrlich and L. Goerigk, *J. Comput. Chem.*, 2011, **32**, 1456–1465.
- S8 D. Dubbeldam, S. Calero, D. E. Ellis and R. Q. Snurr, *Mol. Simul.*, 2016, **42**, 81–101.
- S9 M. C. Bernini, D. Fairen-Jimenez, M. Pasinetti, A. J. Ramirez-Pastor and R. Q. Snurr, *J. Mater. Chem. B*, 2014, **2**, 766–774.
- S10 P. I. Nagy, *Phys. Chem. Chem. Phys.*, 2012, **14**, 849–857.
- S11 A. K. Rappé, C. J. Casewit, K. S. Colwell, W. A. Goddard and W. M. Skiff, *J. Am. Chem. Soc.*, 1992, **114**, 10024-10035
- S12 D. Nazarian, J. S. Camp and D. S. Sholl, *Chem. Mater.*, 2016, **28**, 785–793.
